# Supplementary material for: A reactive copolymer based on Glycidylmethacrylate and Maleic Anhydride: 1-synthesis, characterization and monomer reactivity ratios
Source: Springer Nature journal article supplement (doi:10.1007/s10965-016-1048-8), 2016-07-18
Supplement: MOESM1 [file 10500642]

**A Reactive Copolymer based on Glycidylmethacrylate and Maleic Anhydride: 1- Synthesis, Characterization and Monomer Reactivity Ratios**

*Reza Hasanzadeh1, Peyman Najafi Moghadam1*, Naeimeh Bahri-Laleh2, Farshid Ziaee2*

1Department of Organic chemistry, Faculty of chemistry, Urmia University, Urmia – Iran

2Department of Polymerization Engineering, Iran Polymer and Petrochemical Institute (IPPI), Tehran-Iran

Correspondence to:P. Najafi Moghadam (E-Mail: [p_najafi27@yahoo.com](mailto:p_najafi27@yahoo.com))

**Supporting Information**

**FT-IR(KBr) for copolymer with 1:1 molar ratio:**

2870-2999(aliphatic –C–H; methine, methylene and methyl groups), 1855 and 1783(C=O anhydride),1730(C=O ester), 1451-1479(CH2 bending), 1460-1340(CH3 and CH2 bending vibration of copolymer skeleton), 1256(O=C–O– stretch in ester), 1149-1200(C–O–C ester), 848-910(C–O–C epoxy), 980 and 758 (CH and CH2 Bending vibration of epoxide ring respectively), 550(H–C–C and C–C–C skeletal) cm–1.

**FT-IR(KBr) for GMA homopolymer:**

2870-2999(aliphatic CH; methine, methylene and methyl groups), 1730(C=O ester), 1451-1479(CH2 bending), 1342-1392(CH3 bending), 1256(O=C–O– stretch in ester), 1149-1200(C–O–C ester), 848-910(C–O epoxy), 980 and 758 (CH and CH2 Bending vibration of epoxide ring respectively), 550(H–C–C and C–C–C skeletal) cm–1.

**1H NMR for copolymer (CDCl3, TMS, 300 MHz) δ (ppm):**

1.28, 1.16 and 0.97 (CH3 respectively), 1.97 (CH2 in main chain), 2-2.2 (CH anhydride), 2.6-2.9 (Diasrotopic CH2 epoxide), 3.3 (CH epoxide) and 3.7-4.4 (Diasrotopic O-CH2).

**1H NMR for GMA homopolymer, δ (ppm):**

1.28, 1.15 and 0.95 (mm, rm, rr CH3 respectively), 1.97 (CH2 in main chain), 2.64-2.9 (Diasrotopic CH2 epoxide), 3.29 (CH epoxide) and 3.82-4.39 (Diasrotopic O-CH2).

**Relation of χ to Sequence structure and chemical correlation of the monomers**

| Table S1. Relation of Flory-Huggin interaction parameter, χ to Sequence structure and reactivity ratio | | | | |
| --- | --- | --- | --- | --- |
| Value | r1r2 | Sequence structure | Chemical correlation |
| χ=2 | r1r2<<1 | completely alternating M1 and M2 | exclusive M1 M2 addition | |
| χ>1 | r1r2<1 | skewed toward alternating tendency | M1- M2 | |
| χ=1 | r1r2=1 | random distribution of M1 and M2 | none | |
| χ<1 | r1r2>1 | skewed toward block tendency | M1 M1 or M2 M2 | |
| χ≈0 | r1r2>>1 | complete blocks of M1 and M2 | exclusive M1M1 or M2M2 addition | |

**Solubility of the copolymers**

| Table S2. Solubility of synthesized copolymers in different solvents. | | | | | | | | | | | | | | | | | | | | | | | | | | | | | | | | | | | |
| --- | --- | --- | --- | --- | --- | --- | --- | --- | --- | --- | --- | --- | --- | --- | --- | --- | --- | --- | --- | --- | --- | --- | --- | --- | --- | --- | --- | --- | --- | --- | --- | --- | --- | --- | --- |
| Sample | | |  | |  |  | | | |  | |  |  | | | |  | Solvent | | | | |  | | |  |  |  | |  | | |  | | | |  | |
|  | H2O | | | MeOH | | | EtOH | | Ac | EtOAc | PhMe | | | DO | CH3CN | | | | | DMA | | n-hex | | DMF | | | | | THF | | | DMSO | | | DCM | | | CHCl3 | |
| PGMA | | - | | - | | - | | - * | | - * | -* | | | -** | | - * | | | -** | | -** | | | | -** | | | | -* | | +** | | | +* | | | | +* |
| S8 | | - | | - * | | - | | ++ | | ++ | + * | | | ++ | | ++ | | | ++ | | -** | | | | ++ | | | | ++ | | ++ | | | ++ | | | | ++ |
| S6 | | - | | - * | | - | | ++ | | ++ | + * | | | ++ | | ++ | | | ++ | | - * | | | | ++ | | | | ++ | | ++ | | | ++ | | | | ++ |
| S5 | | - | | - * | | - | | ++ | | + * | + * | | | ++ | | ++ | | | ++ | | - * | | | | ++ | | | | ++ | | ++ | | | ++ | | | | ++ |
| S4 | | - | | - * | | - | | ++ | | + * | - * | | | ++ | | ++ | | | ++ | | - * | | | | ++ | | | | ++ | | ++ | | | ++ | | | | ++ |
| S3 | | - | | - * | | - | | ++ | | + * | - * | | | ++ | | ++ | | | ++ | | - * | | | | ++ | | | | ++ | | ++ | | | ++ | | | | ++ |
| S2 | | - | | - * | | - | | ++ | | + * | - * | | | ++ | | ++ | | | ++ | | - * | | | | ++ | | | | ++ | | ++ | | | ++ | | | | ++ |

(Ac: Acetone, DO: 1, 4- Dioxane, DMA: Dimethylacetamide, n-hex: n-hexane, DMF: N, N- Dimethylformamide, THF: Tetrahydrofuran,

DMSO: Dimethylsulfoxide, DCM: Dichloromethane)

++: Complete solubility, +: Slightly soluble, -: Insoluble, **: High swelling, *: Swelling


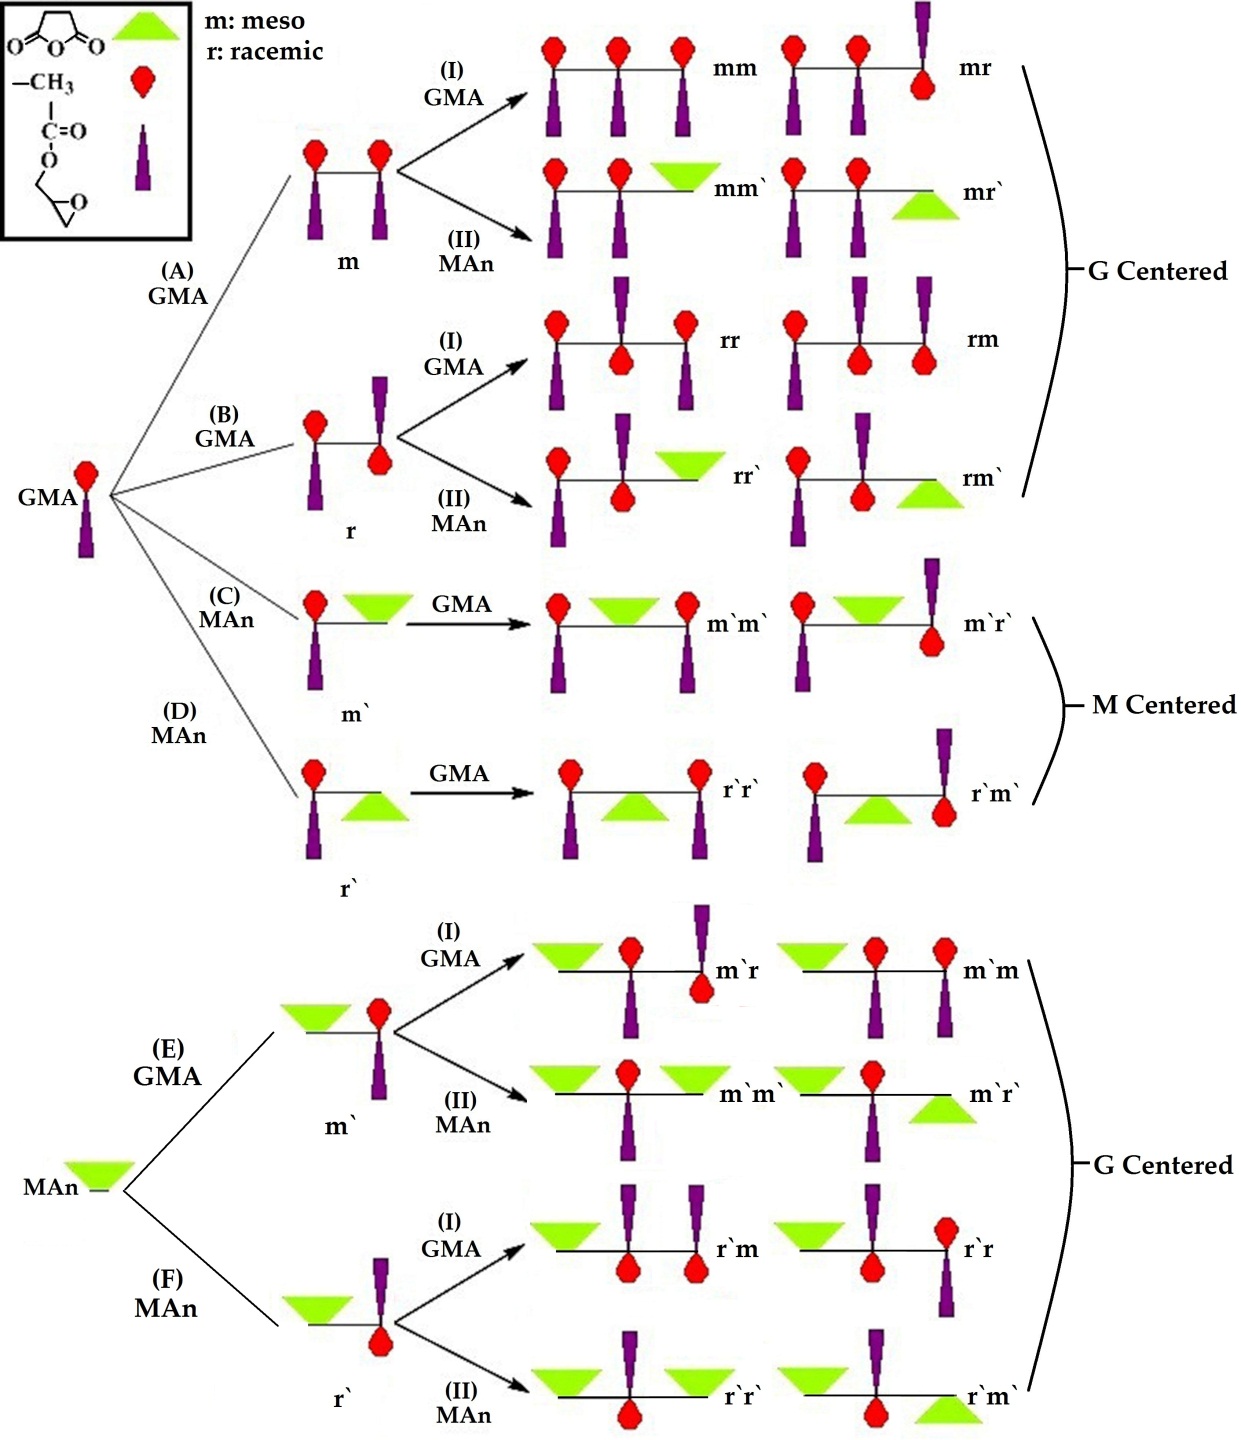


Figure S1. Schematic arrangement of the side groups in G and M centered sequences of triads, considering the chemical composition and the relative stereochemical configuration of neighboring units.

**The IR method for determination of copolymer composition**

**
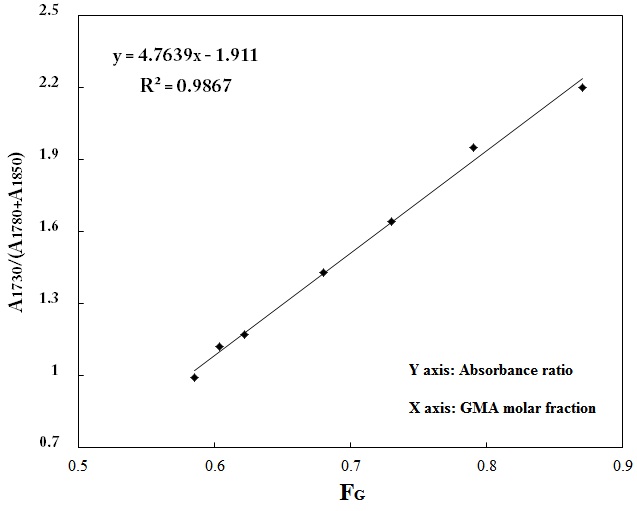
**

Figure S2. Plot of absorbance ratio of ester to anhydride (A1730/ A1850+A1780) versus FG (obtained molar faction of GMA by 1H NMR).

**Crosslinking investigation**

The crosslinking process was also confirmed by DSC in the isothermal heating conditions. The appearance a broad exotherm on the DSC curve of thermotreated copolymers can be explained by formation of intermolecular flexible ester fragments in the structure of crosslinked copolymer. DSC curves of copolymers that recorded under the isothermic conditions are presented in Figure 10. The DSC curves of GMA–alt–MAn copolymers are different at low temperatures before thermal decomposition with the appearance of an exothermic peak at 85–197°C. This is attributed to the intermolecular reaction of epoxy-anhydride of the copolymers. The assignment of this exotherm is supported by the following experimental observations:

(1) The exotherm peak disappears in second heat stage (after cooling).

(2) The FT-IR spectrum of the copolymer (S3) by changing the temperature can be used as a technique for confirmation of the crosslinking process in this linear copolymer. Figure S3 is the FT-IR spectra of copolymer (S3) before and after thermotreated which indicated that intensity of the anhydride ring bands (1845 and 1780 cm-1for C=O groups) and epoxide group (910 cm-1for C-O-C bonds) was decreased, but intensity of –OH (3520 cm-1) was increased at the result of opening the epoxy ring and formation of alcoholic hydroxyl.

.


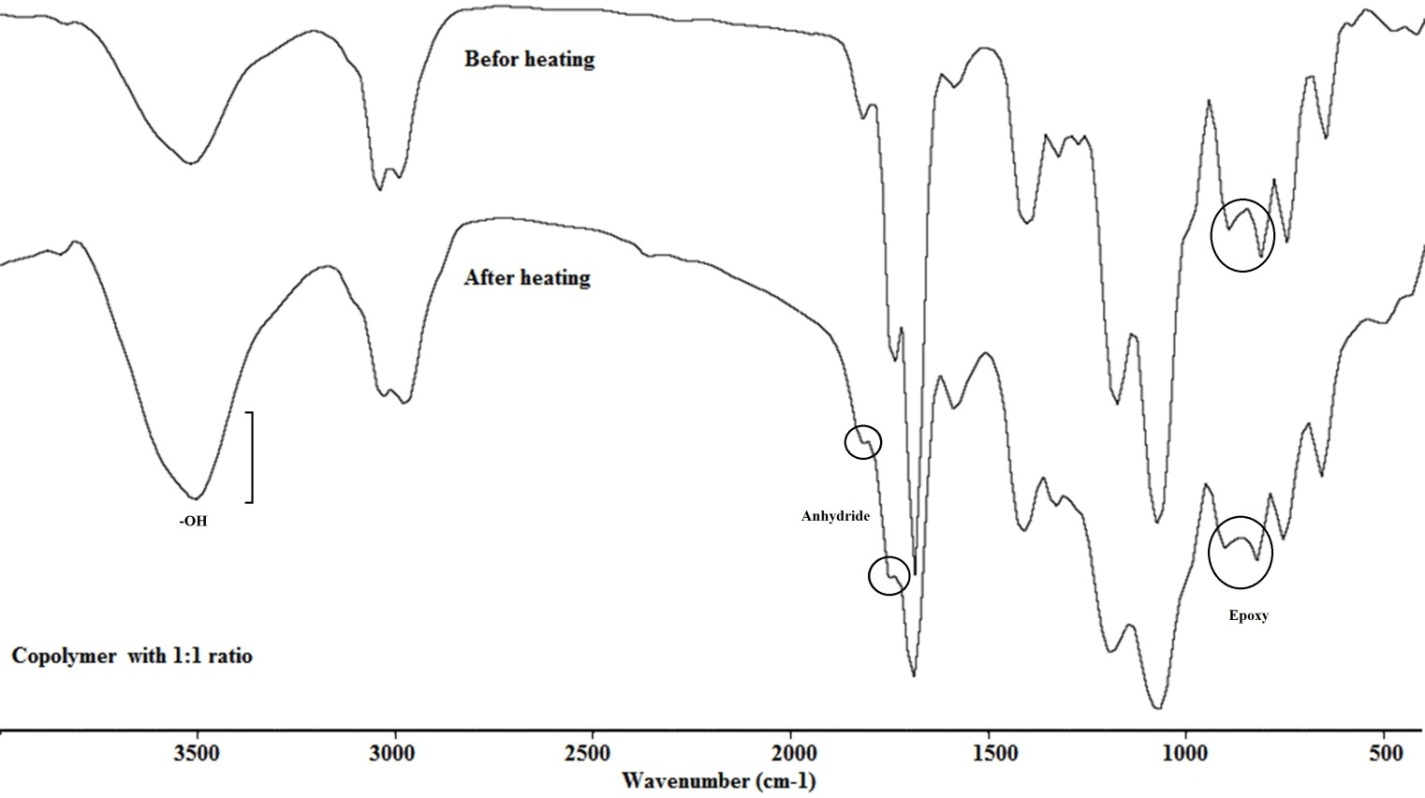


Figure S3. The infrared spectrum of the S3 before and after heating

(3) Similar exotherms which observed for S3 are absent on DSC curves of the copolymers with other ratio.

(4) In DSC curve of PGMA homopolymer there is no curing process.

(5) The amounts of enthalpy reduced by decreasing the MAn content in copolymers which can effect on the crosslinking.

(6) The soluble copolymers have been insoluble after thermotreated or exposed by UV irradiation.
